# Supplementary material for: Long-cycling and high-rate electrochemical performance of expanded graphite cathode materials with a two-stage aluminum storage mechanism
Source: Royal Society of Chemistry journal article supplement (doi:10.1039/d1se01412a), 2021-01-01
Supplement: d1se01412a1.pdf [file d1se01412a1.pdf]

## Supporting Information

### Long-cycle and high-rate electrochemical performance of expanded graphite cathode materials with two-stage aluminum storage mechanism

Chunyan Yang <sup>a,b</sup>, Yunlong Ma <sup>c</sup>, Xiaoqiong Feng <sup>a,b</sup>, Hong Ning <sup>a</sup>, Shiyong Zhang <sup>b</sup>, Jinfeng Li <sup>a,\*</sup>,  
Changsheng An <sup>b,\*</sup>

<sup>a</sup> Central South University, Changsha 410083, Hunan, China

<sup>b</sup> Changsha University, Changsha 410022, Hunan, China

<sup>c</sup> Beijing Institute of Astronautical System Engineering, Beijing 100076, China

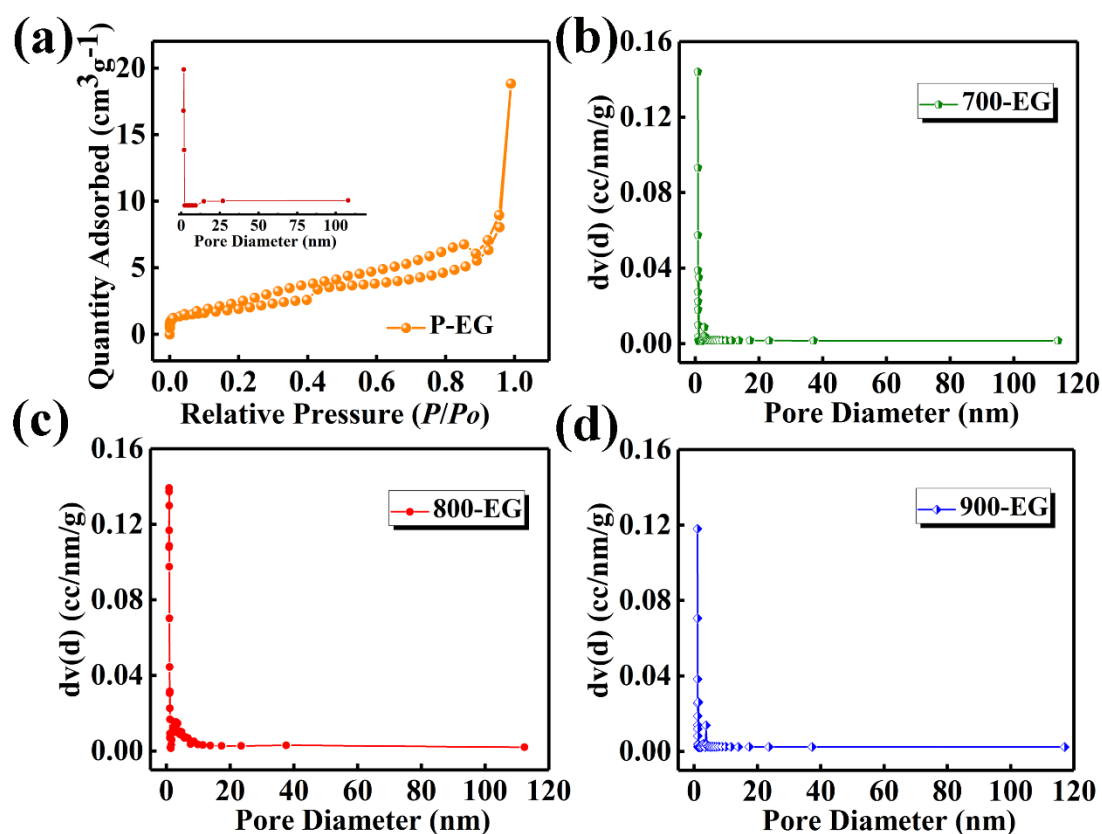

**Fig.S1.** (a) The nitrogen adsorption/desorption isotherms and pore-size distributions of the P-EG; (b-d) the pore-size distributions of the 700- EG, 800-EG and 900-EG.

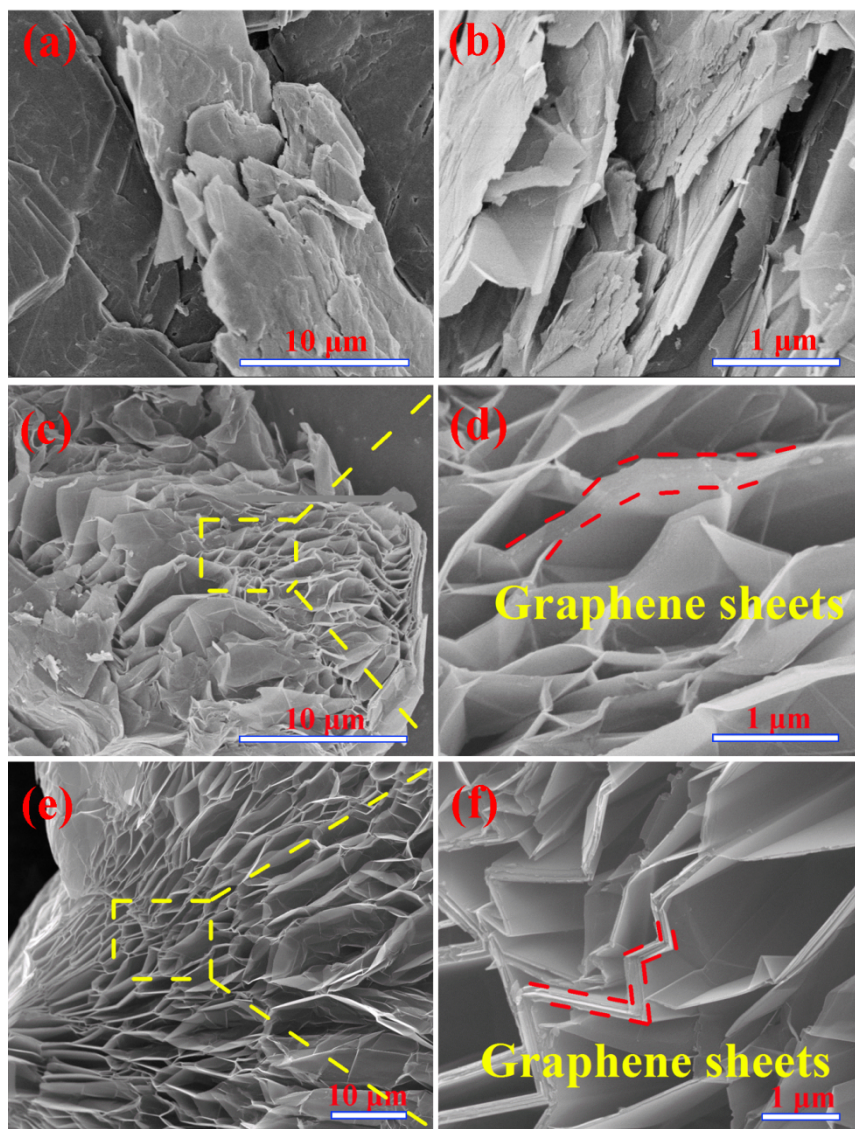

**Fig. S2.** (a, b) SEM micrographs of the P-EG with different magnifications; (c, d) SEM micrographs of the 700-EG with different magnifications; (e, f) SEM micrographs of the 900-EG with different magnifications.

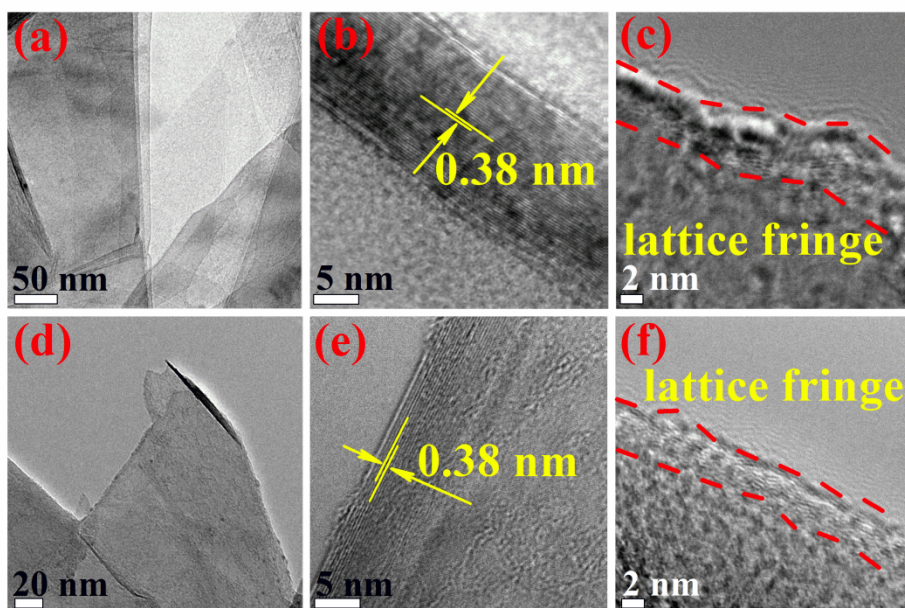

**Fig. S3.** (a-c) TEM image in the 700-EG; (d-f) TEM image of the 900-EG.

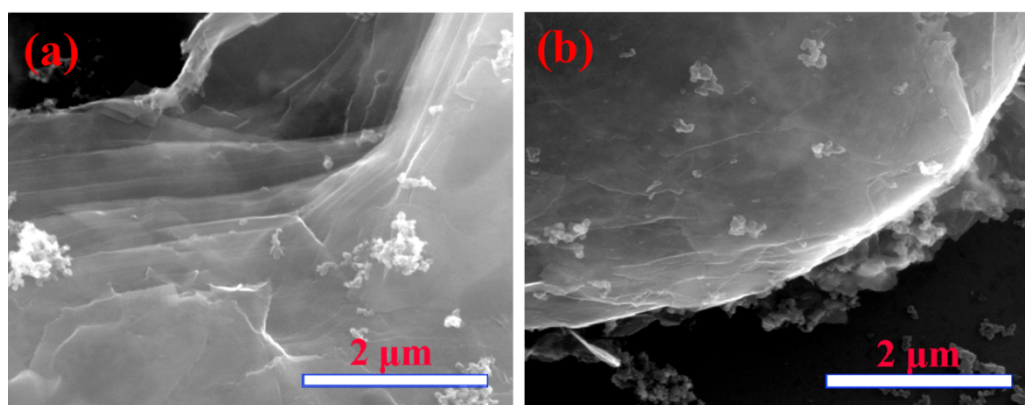

**Fig. S4.** SEM micrographs of the 800-EG electrode after 10 cycles (a) and after 10000 cycles (b).

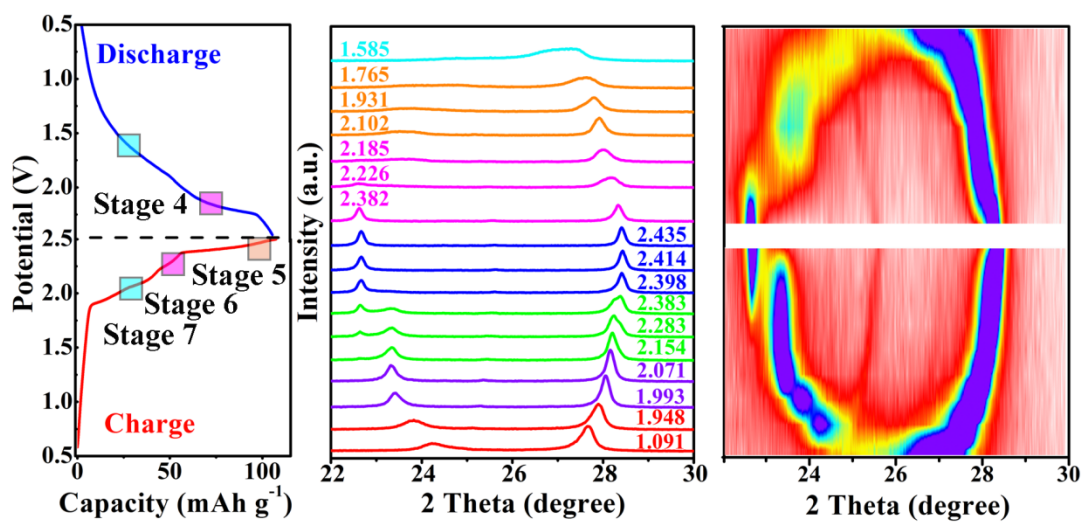

**Fig. S5.** *In-situ* XRD data of the graphite electrode in AGBs under charging and discharging to various voltages under  $0.5 \text{ A g}^{-1}$  for the third cycle.

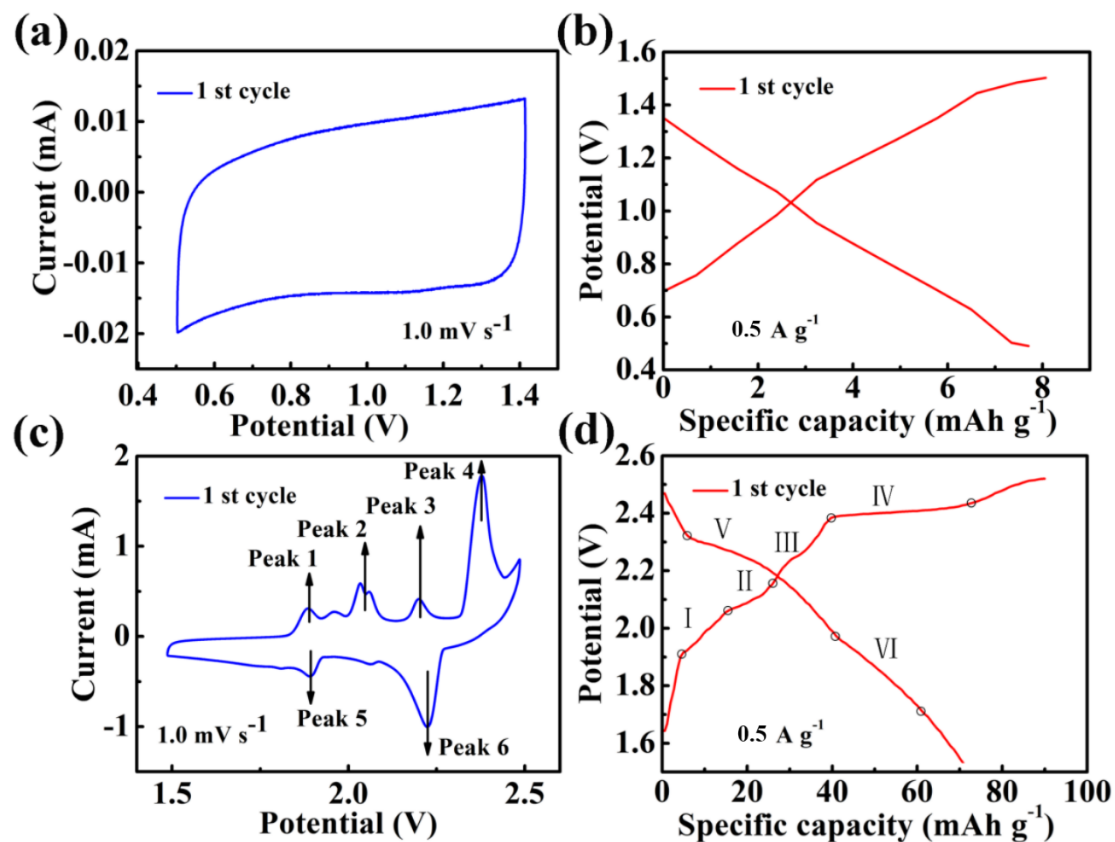

**Fig. S6.** (a) The CV curve of the 800-EG electrode in the voltage range of 0.5-1.5 V; (b) the charge-discharge curves of the 800-EG electrode at  $0.5 \text{ A g}^{-1}$  at 0.5-1.5 V; (c) the CV curve of the 800-EG electrode in the voltage range of 1.5-2.5 V; (d) the charge-discharge curves of the 800-EG electrode at  $0.5 \text{ A g}^{-1}$  at 1.5-2.5 V.

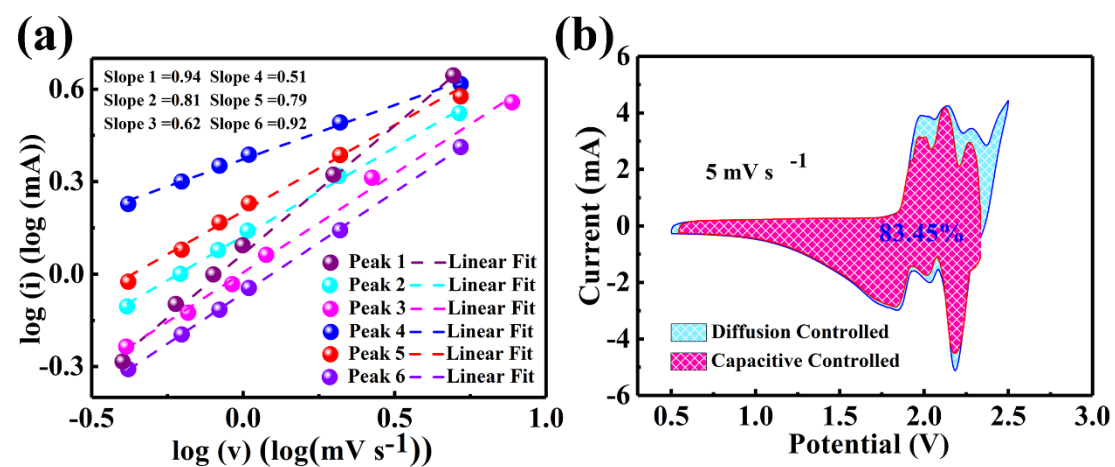

**Fig. S7.** (a) corresponding  $\log(i)$  versus  $\log(v)$  plots at specific peak currents; (b) CV curve with the capacitive contribution fraction shown by the shaded area at a scan rate of  $5 \text{ mV s}^{-1}$  scan rates of the 800-EG at 0.5-2.5.

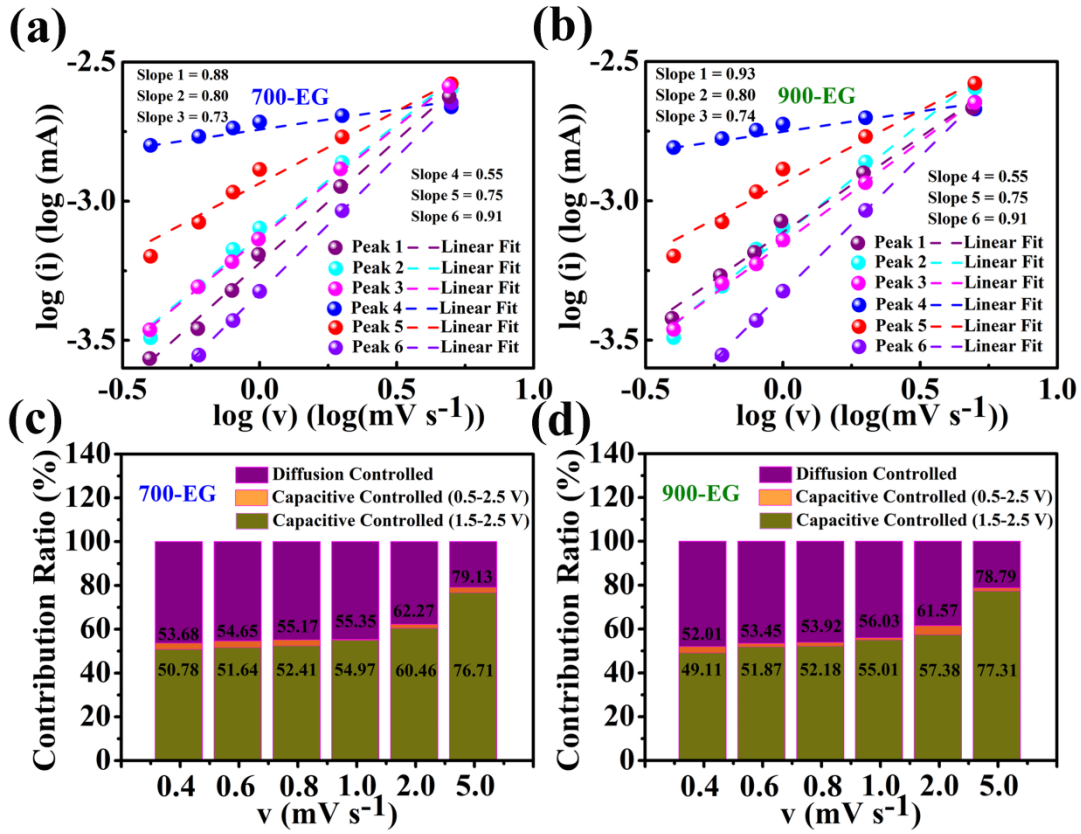

**Fig. S8.** (a, b) corresponding log (i) versus log (v) plots at specific peak currents of 700-EG and 900-EG electrode (1.5-2.5V); (c, d) bar chart showing the percent of capacitive contribution at different scan rates of 700-EG and 900-EG electrode.

### Calculation Process:

The diffusion coefficient of  $\text{AlCl}_4^-$  ( $D_{\text{AlCl}_4^-}$ ) in the expanded graphite electrode material can be obtained by the following formula:

$$Z_{re} = Rct + Rs + \sigma\omega^{-1/2} \quad (1)$$

$$D_{\text{AlCl}_4^-} = \frac{(RT)^2}{2A^2n^4F^4C_{\text{AlCl}_4^-}^2\sigma^2} \quad (2)$$

Where R is the gas constant (8.314J K<sup>-1</sup> mol<sup>-1</sup>); T is the absolute temperature (293.15 K, 313.15K and 333.15K); A is the surface area of the positive (1 cm<sup>2</sup>), n is charge transfer number of  $\text{AlCl}_4^-$ ; F is the Faraday constant (96000 C mol<sup>-1</sup>);  $C_{\text{AlCl}_4^-}$  is the concentration of  $\text{AlCl}_4^-$  in the electrode,  $\omega$  is the angular frequency, and  $\sigma$  is the Warburg factor, which is relative to  $Z_{re}$ . The value can be obtained from the slope of the lines in **Figure 5**.
